# Supplementary material for: Silicate Inhibits the Cytosolic Influx of Chloride in Protoplasts of Wheat and Affects the Chloride Transporters, TaCLC1 and TaNPF2.4/2.5
Source: MDPI journal article supplement (doi:10.3390/plants11091162), 2022-04-26
Supplement: s1 [file s1]

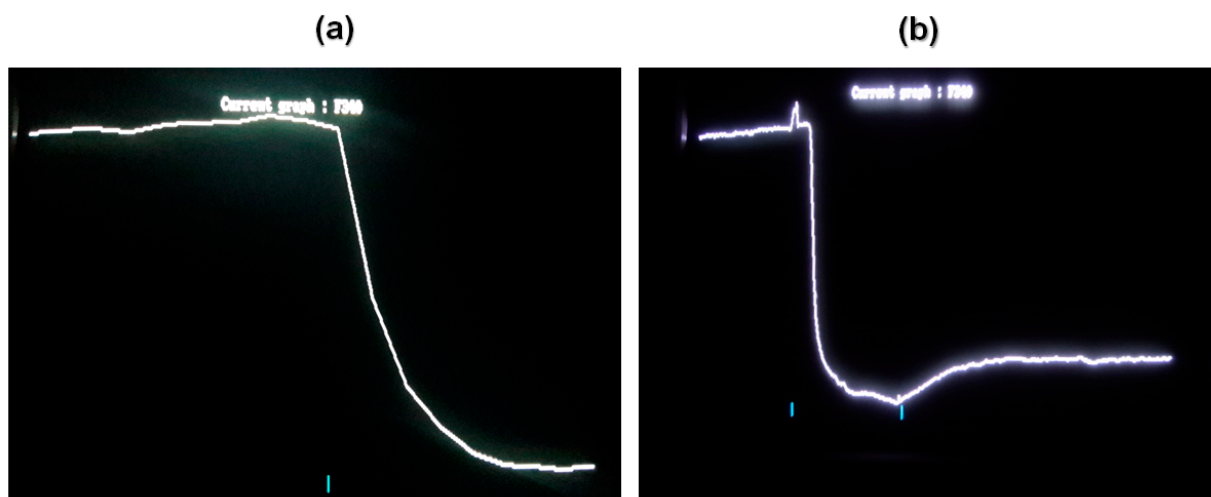

**Figure S1.** The original traces photographed in the computer monitor showing a decrease in fluorescence intensity after addition of 100 mM NaCl (a) and a gradual raise in fluorescence intensity after the addition of 1 mM  $K_2SiO_3$  to the MQAE-labelled wheat protoplasts (b).

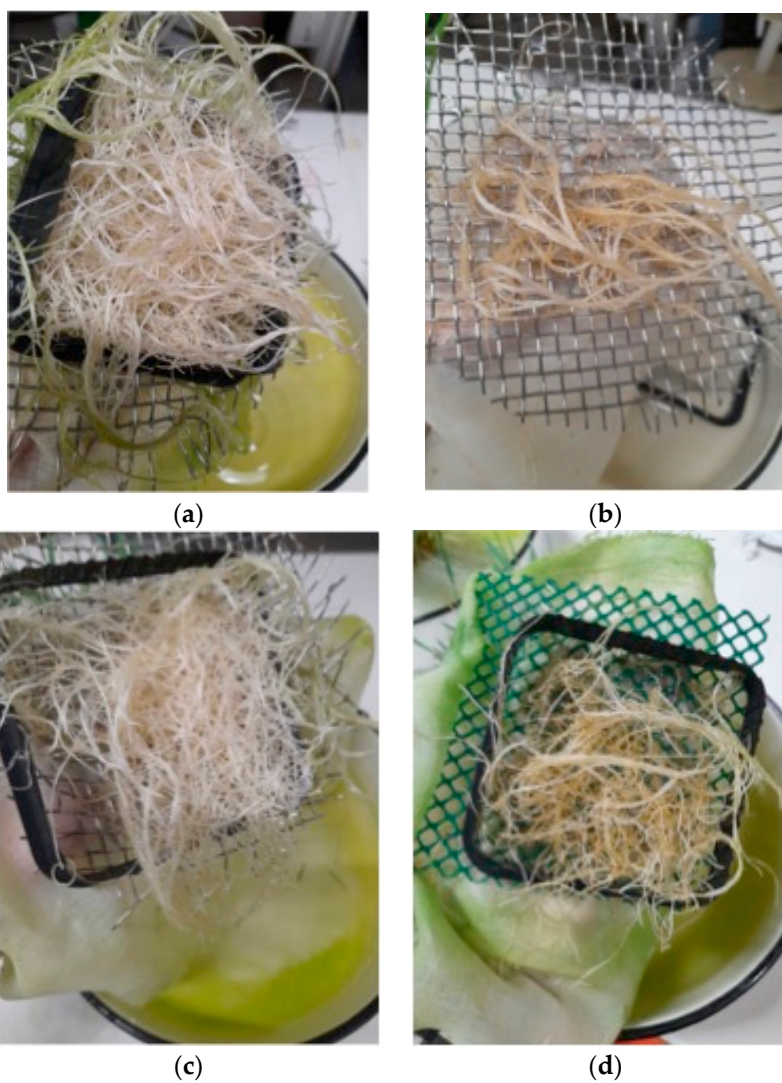

**Figure S2.** Root growth of cv. Vinjett wheat seedlings grown under various treatments. (a) Control seedlings. (b) 100 mM NaCl (c) 1 mM K<sub>2</sub>SiO<sub>3</sub> (d) 100 mM NaCl + 1 mM K<sub>2</sub>SiO<sub>3</sub>.

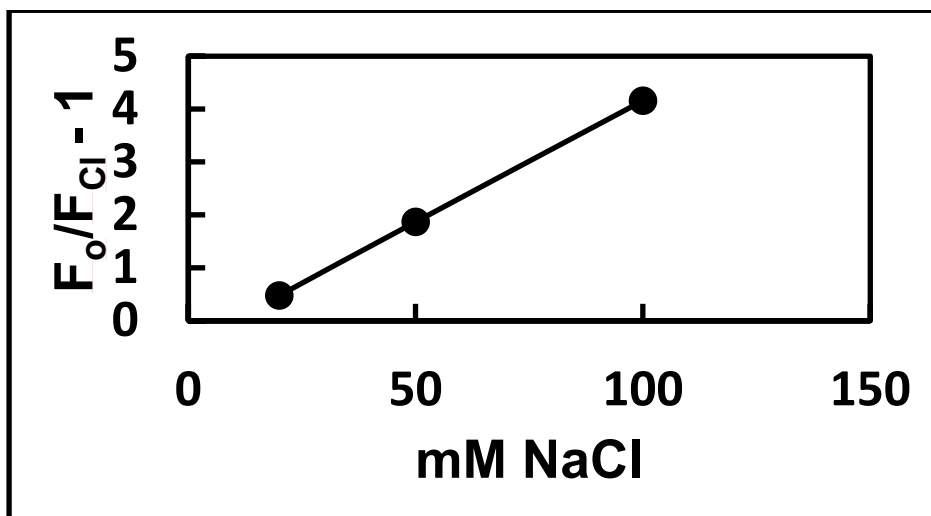

**Figure S3.** In situ calibration of MQAE fluorescence versus NaCl concentration shown in a Stern-Volmer plot according to Verkman et al. (1989).  $F_0$  = fluorescence in the absence of chloride,  $F_{Cl}$  = fluorescence in the presence of  $Cl^-$ . Excitation and emission wavelengths were  $350 \pm 10$  and  $460 \pm 10$ , respectively.
